# Supplementary material for: A bistable [2]catenane switched by hetero-radical pairing interactions
Source: Royal Society of Chemistry journal article supplement (doi:10.1039/d0cc02012e), 2020-01-01
Supplement: d0cc02012e1.pdf [file d0cc02012e1.pdf]

# A Bistable [2]Catenane Switched by Hetero-Radical Pairing Interactions

Yang Zhang<sup>1,§</sup>, Qiong Chen<sup>1,§</sup>, Yan Wang<sup>1</sup>, Haiying Wang<sup>2</sup>, Fahe Cao<sup>3</sup>,  
Andrew C.-H. Sue<sup>2</sup> and Hao Li<sup>1\*</sup>

<sup>1</sup> Department of Chemistry, Zhejiang University, Hangzhou 310027, P. R. China.

<sup>2</sup> School of Pharmaceutical Science and Technology, Tianjin University, Tianjin 300072, P. R. China.

<sup>3</sup>School of Materials, Sun Yat-sen University, Guangzhou 510006, P. R. China. \*e-mail: [lihao2015@zju.edu.cn](mailto:lihao2015@zju.edu.cn)

§ These authors contributed equally to this work.

## Supporting Information

1. Material, Instrumentation
2. Synthetic Procedures
3. Synthesis, Separation and Characterization of Macrocycle **3** and [2]Catenane
4. The whole reduction of process of [2]Catenane **4**<sup>4+</sup>•4PF<sub>6</sub><sup>-</sup> and UV/ Vis/ NIR spectroscopy
5. HPLC Analyses
6. Reference

## 1. Material, Instrumentation

All reagents and solvents were purchased from commercial sources and used without further purification. All experiments involving radicals were handled in glove boxes. Cyclobis(paraquat-p-phenylene) tetrakis(hexafluorophosphate) ( $\text{CBPQT}^{4+}\cdot 4\text{PF}_6^-$ ),<sup>1</sup> compound **1**<sup>2</sup> were prepared according to literature procedures. Nuclear magnetic resonance (NMR) spectra were recorded at ambient temperature using Bruker AVANCE III 400/500 spectrometers, with working frequencies of 400/500 and 100/125 MHz for  $^1\text{H}$  and  $^{13}\text{C}$ , respectively. Chemical shifts are reported in ppm relative to the residual internal non-deuterated solvent signals ( $\text{CD}_3\text{CN}$ :  $\delta = 1.94$  ppm;  $\text{CDCl}_3$ :  $\delta = 7.26$  ppm). High-resolution mass spectra (HRMS) were recorded on a fourier transform ion cyclotron resonance mass spectrometry (FT-ICR MS). Cyclic voltammetry experiments (CV) was carried out at room temperature in argon-purged solutions in MeCN with a Gamry multipurpose instrument (reference 600) interfaced to a PC. CV experiments were performed using a glassy carbon working electrode ( $0.018\text{ cm}^2$ , Cypress system). The electrode surface was polished routinely with a  $0.05\text{ }\mu\text{m}$  alumina-water slurry on a felt surface immediately before use. The counter electrode was a Pt coil and the reference electrode was a Ag wire. The concentration of the sample and supporting electrolyte tetrabutylammonium hexafluorophosphate ( $\text{TBAPF}_6$ ) were  $1.0 \times 10^{-3}\text{ mol L}^{-1}$  and  $0.1\text{ mol L}^{-1}$ , respectively. The scan rate was set to  $200\text{ mV s}^{-1}$ . UV-Vis absorption spectra were taken on a Cary series UV-Vis-NIR spectrophotometer.

## 2. Synthetic Procedures

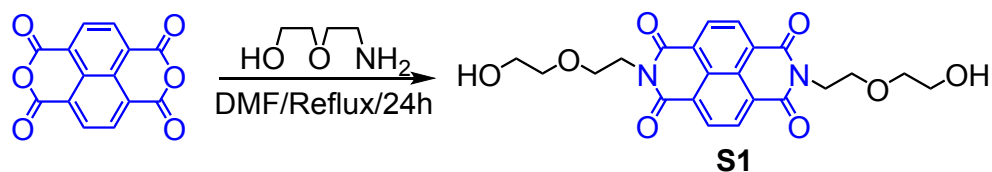

### Supplementary Figure 1. Synthesis of **S1**

**S1**: 1,4,5,8-naphthalene tetracarboxylic dianhydride (500 mg, 1.86 mmol) and 2-(2-aminoethoxy)ethanol (488 mg, 4.65 mmol) were combined in DMF (15 mL). The reaction mixture was refluxed at 90 °C for 24 hours. After cooling to room temperature, the reaction mixture was poured into water. The precipitate was collected by filtration and washed with water (3 x 50 mL) and methanol (3 x 50 mL), before it dried in *vacuo* to afford the pure product **S1** as a pink solid (624 mg, 61%). <sup>1</sup>H NMR (400 MHz, CDCl<sub>3</sub>): δ 8.77 (4H, s), 4.48 (4H, t, *J* = 5.6 Hz), 3.88 (4H, t, *J* = 5.6 Hz), 3.69-3.65 (8H, m). <sup>13</sup>C NMR (100 MHz, CDCl<sub>3</sub>): δ 163.1, 131.2, 126.8, 126.6, 76.7, 72.3, 68.2, 61.8, 40.0. (ESI-MS): *m/z* Calcd for C<sub>22</sub>H<sub>22</sub>N<sub>2</sub>NaO<sub>8</sub>: 465.1274, Found: 629.1924 (M + Na)<sup>+</sup>.

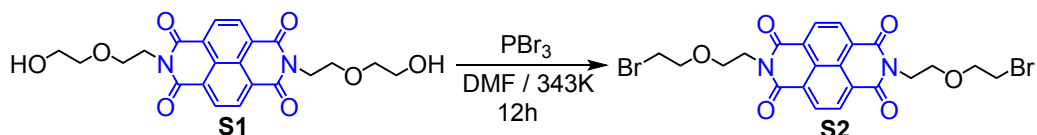

### Supplementary Figure 2. Synthesis of **S2**

**S2**: PBr<sub>3</sub> (0.7 mL, 7.45 mmol) was added to a solution of compound **S1** (400 mg, 0.90 mmol) in dry DMF (20 mL). The mixture was stirred at 70 °C for 12 h. After cooling to room temperature, the reaction mixture was slowly poured into 5% aq. NaHCO<sub>3</sub>, before it was dried in *vacuo* to afford compound **S2** (624 mg, 61%) as a white solid that was used in the next step without further purification.

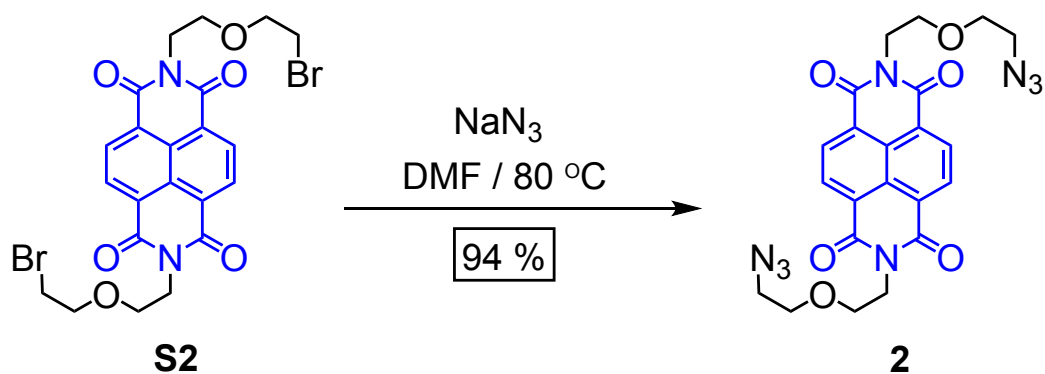

**Supplementary Figure 3. Synthesis of 2**

**2:** Compound **S2** (375 mg, 0.5 mmol) and  $\text{NaN}_3$  (98 mg, 1.5 mmol) were dissolved in DMF (20 mL). The reaction mixture was stirred at 80 °C for 24 h. After cooling down to room temperature, the solution was poured into  $\text{H}_2\text{O}$  (50 mL). The resulting mixture was extracted with EtOAc (3 x 20 mL) and the combined organic solution was washed three times with saturated aqueous NaCl solution (3 x 100 mL). After dried with  $\text{MgSO}_4$ , the solvent was removed in vacuo to afford the desired product **2** (231 mg, 94%) as a white solid.  $^1\text{H}$  NMR (400 MHz,  $\text{CDCl}_3$ ):  $\delta$  8.68 (s, 4H), 4.49 (t,  $J = 5.6$  Hz, 4H), 3.88 (t,  $J = 5.6$  Hz, 4H), 3.71 (t,  $J = 4.9$  Hz, 4H), 3.32 (t,  $J = 4.9$  Hz, 4H).  $^{13}\text{C}$  NMR (100 MHz,  $\text{CDCl}_3$ ):  $\delta$  163.0, 131.0, 126.8, 126.6, 69.8, 67.9, 50.7, 39.6. (ESI-MS):  $m/z$  Calcd for  $\text{C}_{22}\text{H}_{20}\text{N}_8\text{NaO}_6$ : 515.1404, Found: 515.1397 ( $\text{M} + \text{Na}$ ) $^+$ .

### 3. Synthesis, Separation and Characterization of Macrocycle 3 and [2]Catenane

$4^{4+} \cdot 4\text{PF}_6^{-}$

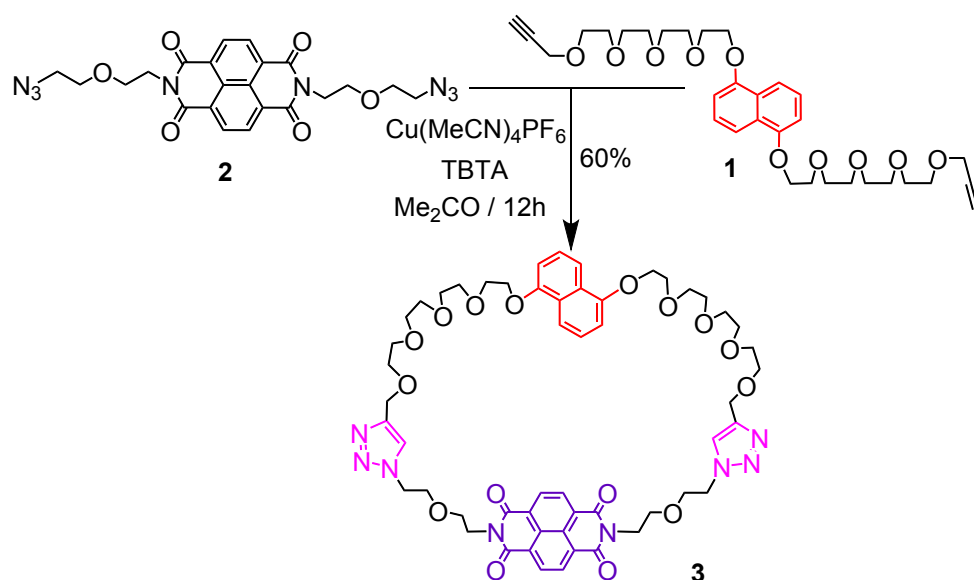

#### Supplementary Figure 5. Synthesis of macrocycle 3

**3**: The diazide **2** (197 mg, 0.40 mmol), tris-(benzyltriazolylmethyl)amine (TBTA) (21 mg, 0.04 mmol), and the **1** (185 mg, 0.32 mmol) was placed in a round-bottomed flask (100 mL) and dissolved in dry  $\text{Me}_2\text{CO}$ . The flask was filled with a nitrogen atmosphere.  $\text{Cu}(\text{MeCN})_4\text{PF}_6$  (21 mg, 0.04 mmol) was added and the reaction mixture was stirred for 24 h at room temperature. The solvent was then evaporated, yielding the crude product, which was purified by column chromatography [ $\text{SiO}_2$ :EtOAc] to afford the pure macrocyclic compound **3** as a burgundy solid (130 mg, 36%).  $^1\text{H NMR}$  (500 MHz,  $\text{CDCl}_3$ , 298K):  $\delta$  8.56 (s, 4H), 7.75 (s, 2H), 7.29 (d,  $J = 10.0$  Hz, 2H), 6.95 (t,  $J = 5.0$  Hz, 2H), 6.44 (d,  $J = 10.0$  Hz, 2H), 4.48 (t,  $J = 5.0$  Hz, 4H), 4.47 (s, 4H), 4.41 (t,  $J = 5.0$  Hz, 4H), 4.11 (t,  $J = 5.0$  Hz, 4H), 3.96 (t,  $J = 5.0$  Hz, 4H), 3.86-3.60 (m, 32H).  $^{13}\text{C NMR}$  (600 MHz,  $\text{CDCl}_3$ , 298K):  $\delta = 162.9, 153.6, 145.0, 130.9, 125.9, 125.9, 125.7, 124.4, 124.0, 114.3, 104.8, 71.1, 70.8, 70.8, 70.6, 69.8, 69.7, 69.0, 68.3, 67.6, 64.7, 50.2, 39.6$ . **ESI-HRMS**  $m/z$  calcd for  $[\text{M}+\text{Na}]^+$  1103.4181; found 1103.4179.

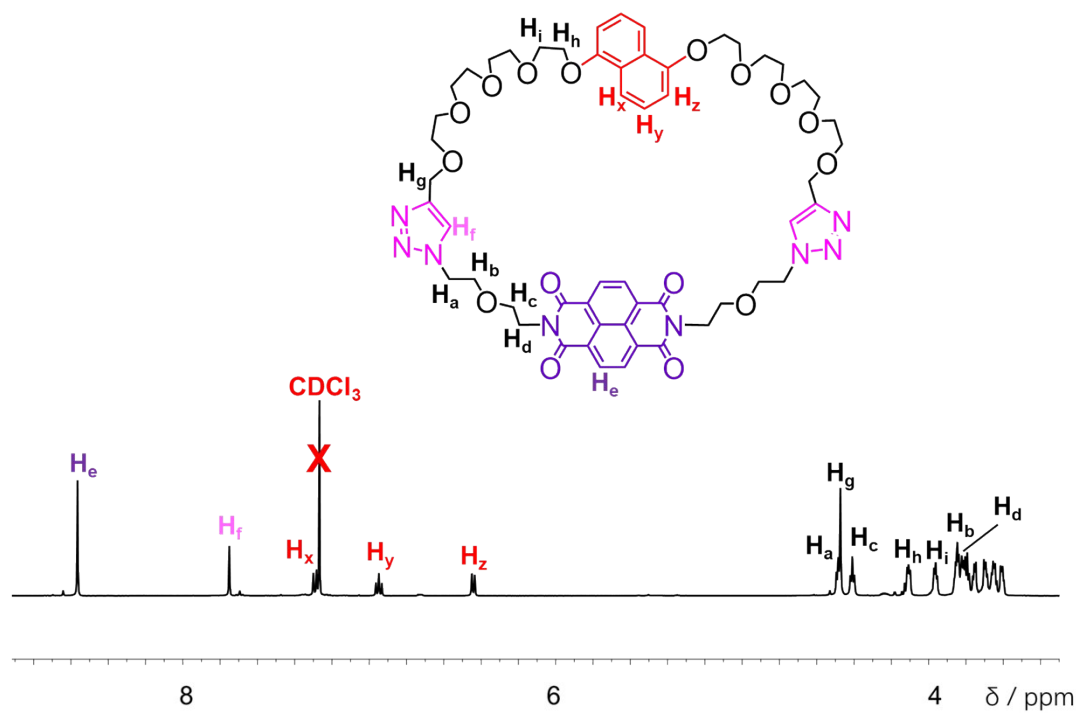

**Supplementary Figure 6.** Partial  $^1\text{H}$  NMR spectra (500 MHz,  $\text{CDCl}_3$ , 298 K) of **3**.

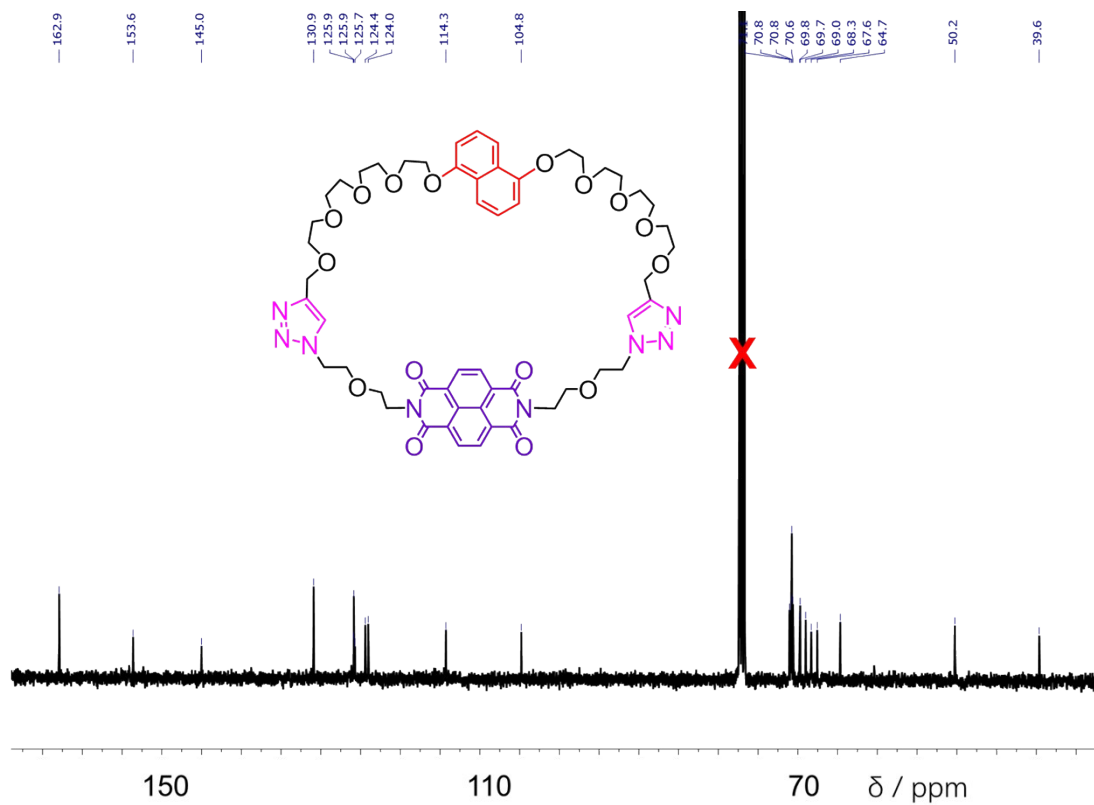

Supplementary Figure 7. <sup>13</sup>C NMR spectra (150 MHz, CDCl<sub>3</sub>, 298 K) of **3**.

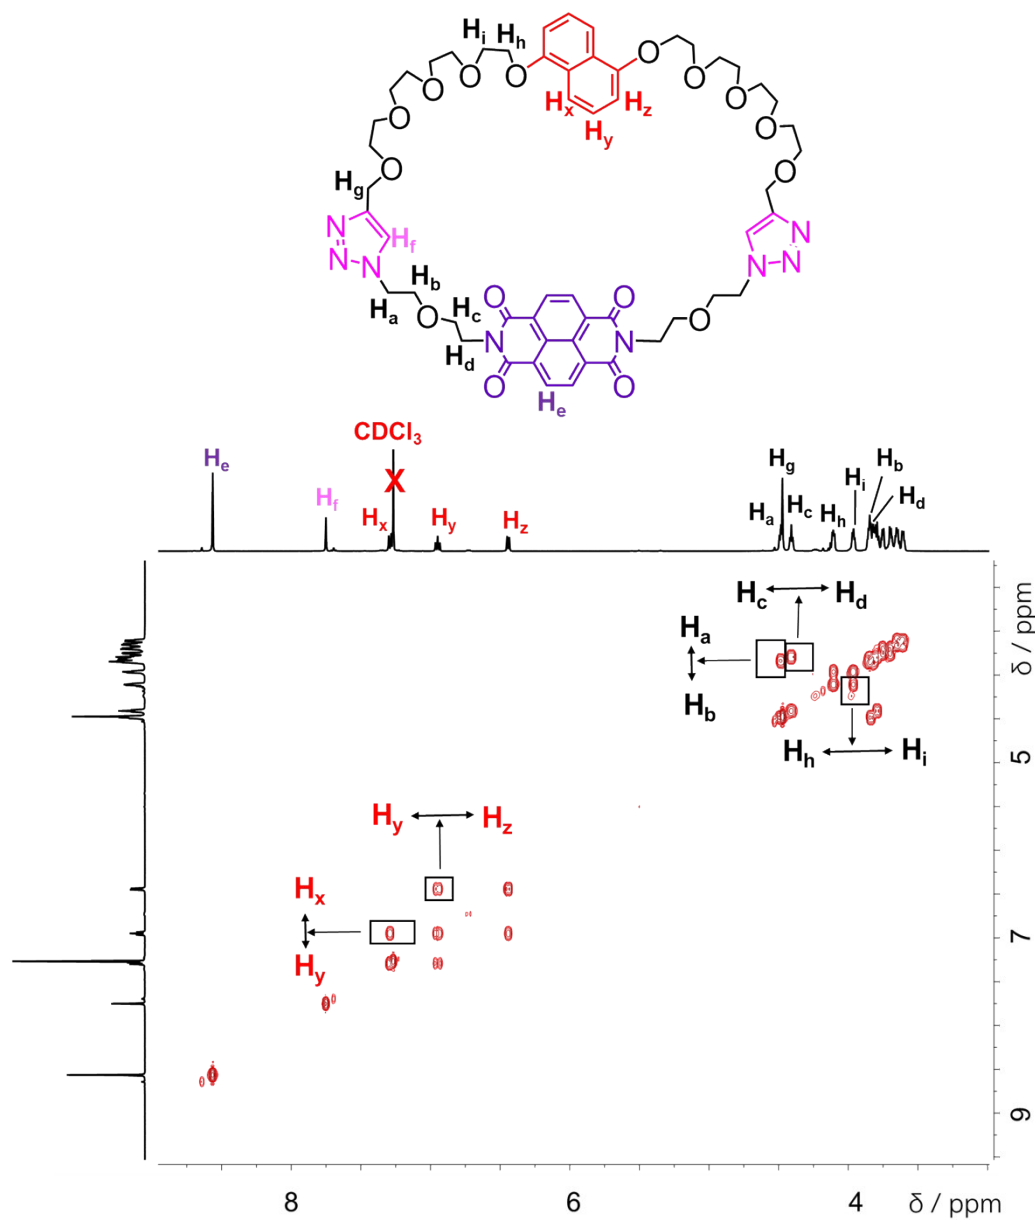

**Supplementary Figure 8.** <sup>1</sup>H-<sup>1</sup>H COSY spectrum (500 MHz, CDCl<sub>3</sub>, 298 K) of **3**.

Key correlation peaks are labeled in the spectrum.



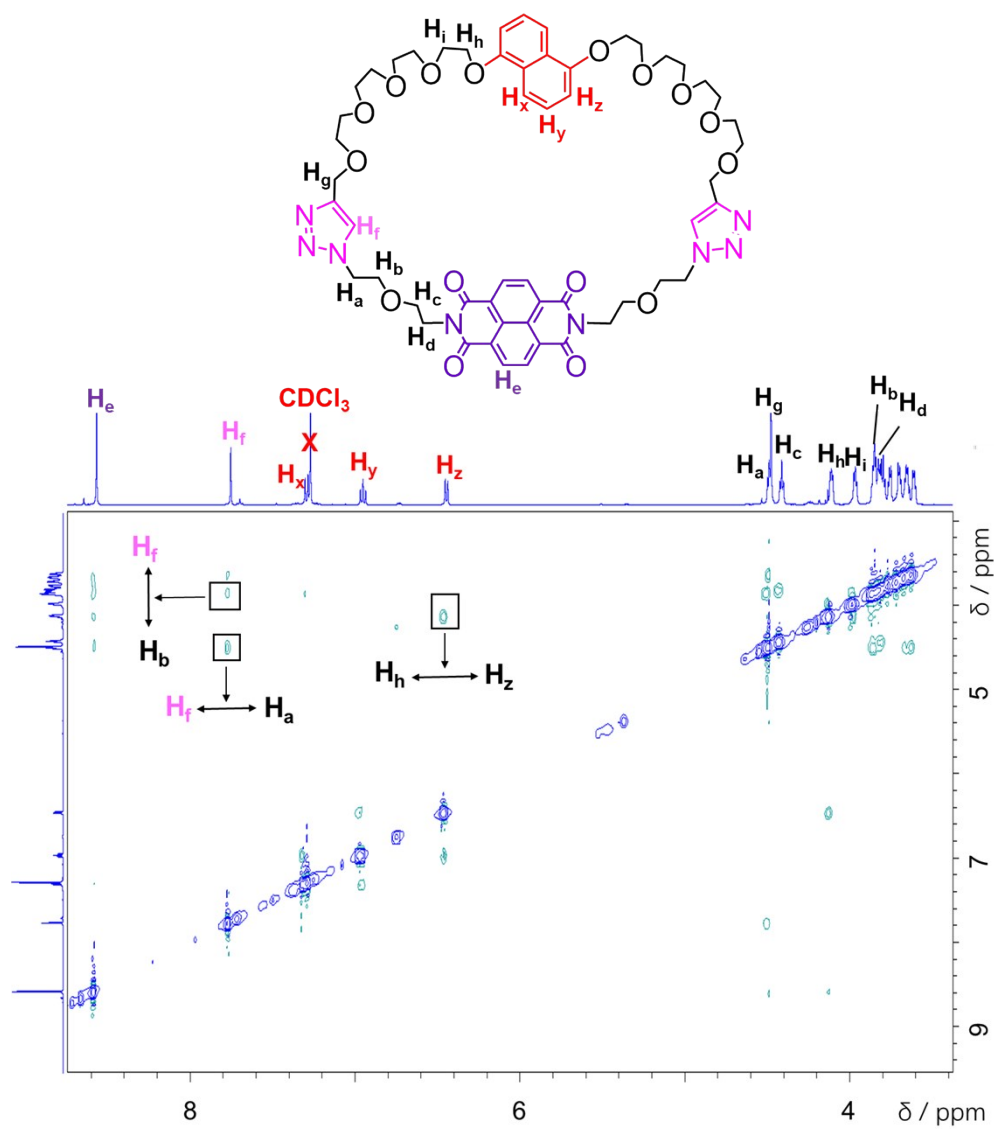

**Supplementary Figure 9.**  $^1\text{H}$ - $^1\text{H}$  NOESY spectrum (500 MHz,  $\text{CDCl}_3$ , 298 K) of 3. Key correlation peaks are labeled in the spectrum.

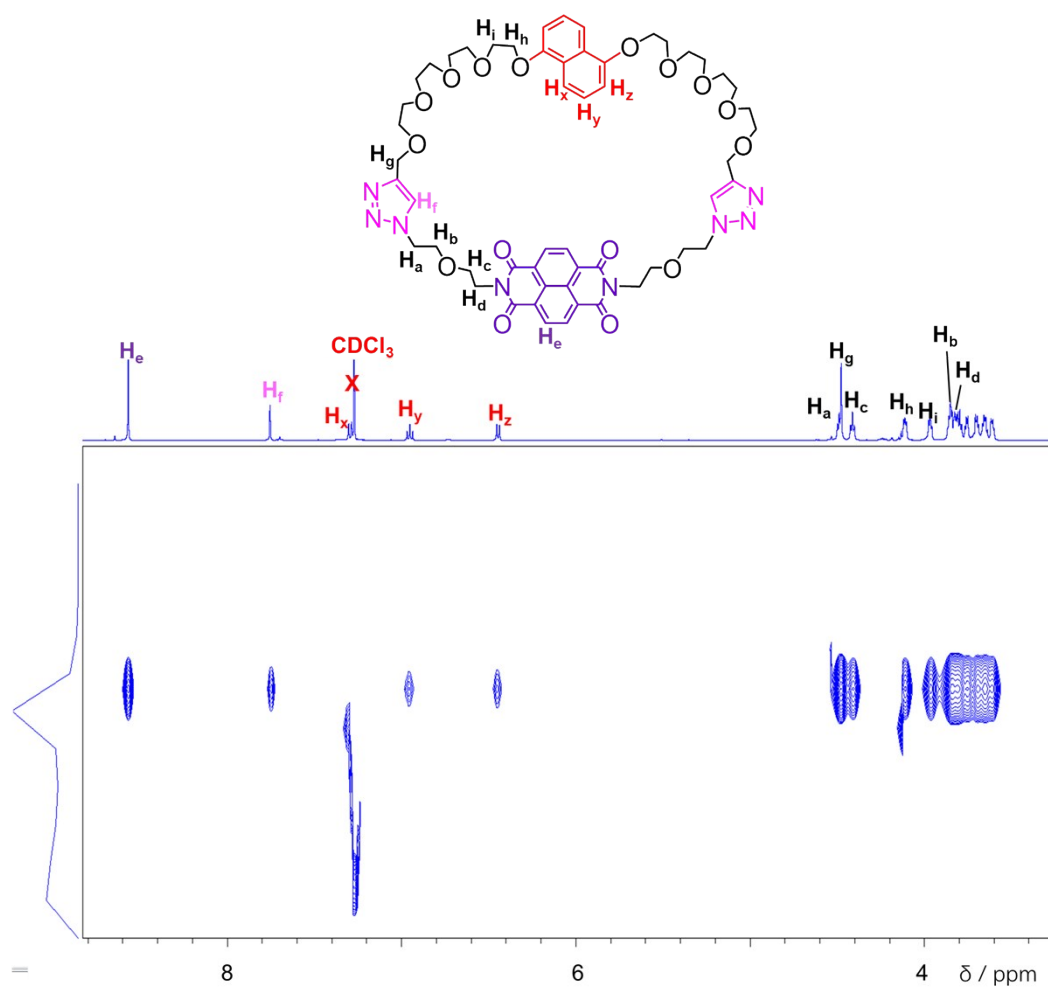

**Supplementary Figure 10.** DOSY spectrum (500 MHz, CDCl<sub>3</sub>, 298 K) of **3**.

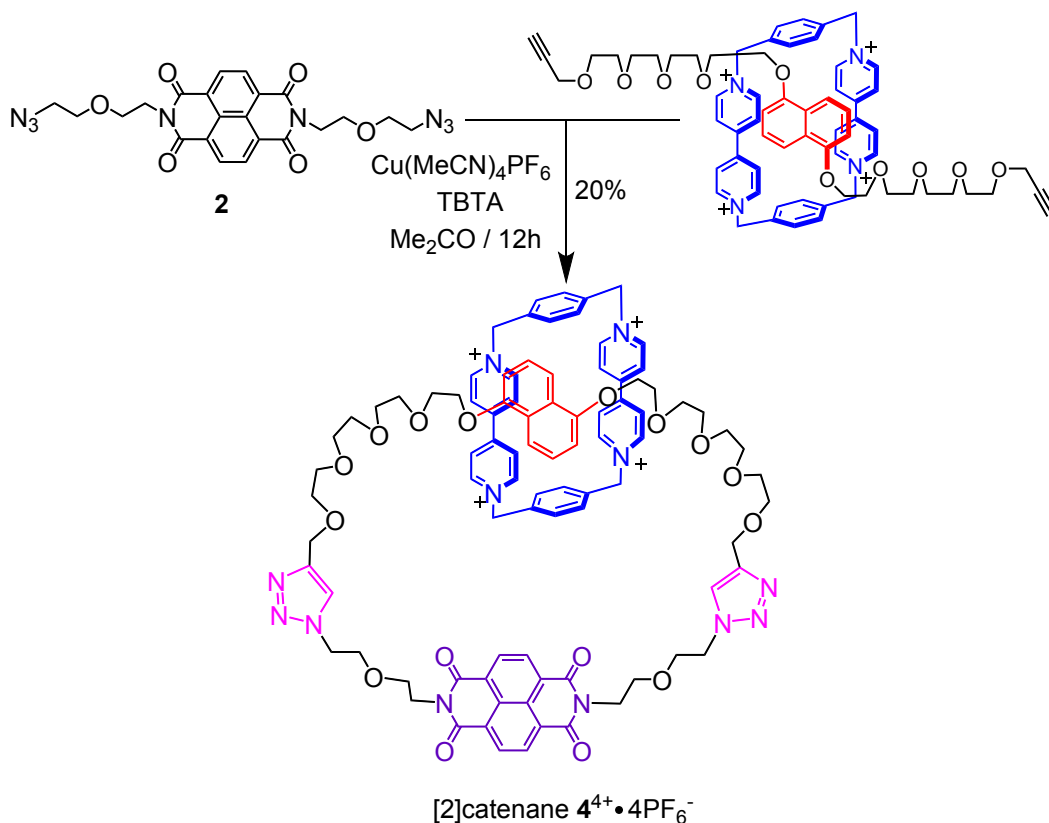

**Supplementary Figure 11.** Synthesis of [2]catenane  $4^{4+} \cdot 4PF_6^-$

[2]catenane  $4^{4+} \cdot 4PF_6^-$ : The diazide **2** (80 mg, 0.16 mmol), compound **1** (129 mg, 0.21 mmol) and **CBPQT** $^{4+} \cdot 4PF_6^-$  (55 mg, 0.05 mmol), as well as  $Cu(MeCN)_4PF_6$  (21 mg, 0.04 mmol) and TBTA (21 mg, 0.04 mmol), were dissolved in  $Me_2CO$  (20 mL) at room temperature. The reaction mixture was stirred overnight under argon. The solvent was evaporated off and the resulting purple solid was purified by column chromatography [ $SiO_2$ : 2M  $NH_4Cl$  / MeOH /  $MeNO_2$  (12 : 7 : 1)]. The solvent was then evaporated, followed by adding  $NH_4PF_6$  (2 g) and water (100 mL). The purple solid was collected and washed with water to give  $4^{4+} \cdot 4PF_6^-$  (23.5 mg, 20%).  $^1H$  NMR (600 MHz,  $CD_3CN$ , 333K):  $\delta$  8.88 (b, 8H), 8.68 (s, 4H), 8.03 (s, 8H), 7.55 (s, 2H), 7.36 (s, 8H), 6.28 (d,  $J = 7.8$  Hz, 1H), 6.03 (t,  $J = 8.4$  Hz, 1H), 5.78 (s, 8H), 4.45 (s, 4H), 4.37-3.11 (m, 48H), 2.5 (m, 2H).  $^{13}C$  NMR (600 MHz,  $CD_3CN$ , 298K):  $\delta$  = HRMS (ESI):  $m/z$  Calcd for  $C_{90}H_{96}N_{12}O_{16}$ : 400.1762, Found: 400.1735 ( $M - 4PF_6$ ) $^{4+}$ .  $m/z$  Calcd for  $C_{90}H_{96}F_6N_{12}O_{16}P$ : 581.8898, Found: 581.8893 ( $M - 3PF_6$ ) $^{3+}$ .  $m/z$  Calcd for  $C_{90}H_{96}F_{12}N_{12}O_{16}P_2$ : 945.3170, Found: 945.3129 ( $M - 2PF_6$ ) $^{2+}$ .

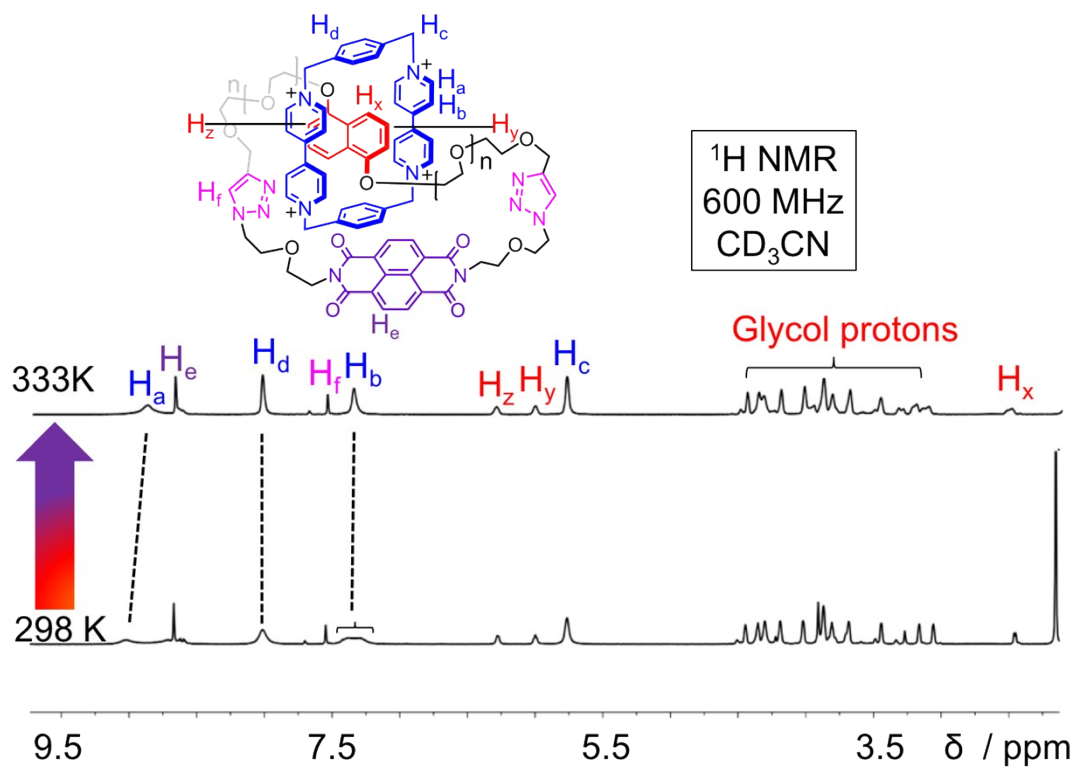

**Supplementary Figure 12.** Partial  $^1\text{H NMR}$  spectrum of the [2]catenane  $4^{4+} \cdot 4\text{PF}_6^-$  (600 MHz,  $\text{CD}_3\text{CN}$ ), recorded at 298 K (bottom) and 333 K (top).

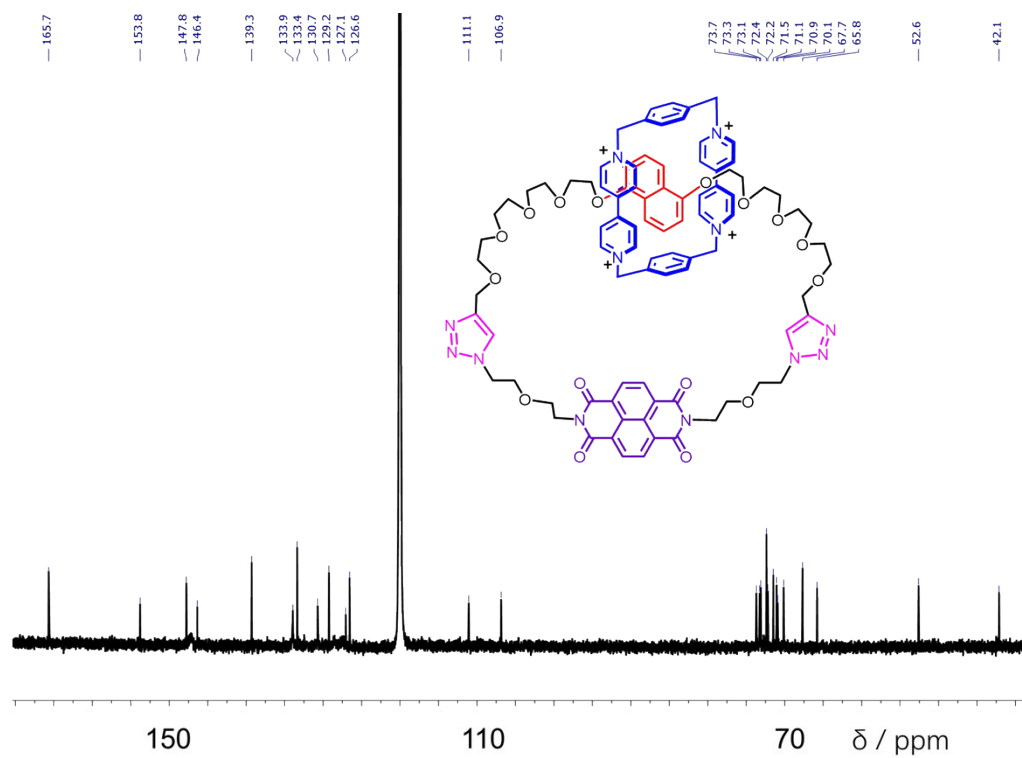

**Supplementary Figure 13.**  $^{13}\text{C}$  NMR spectra (150 MHz,  $\text{CD}_3\text{CN}$ , 298 K) of [2]catenane  $4^{4+}\cdot 4\text{PF}_6^-$ .

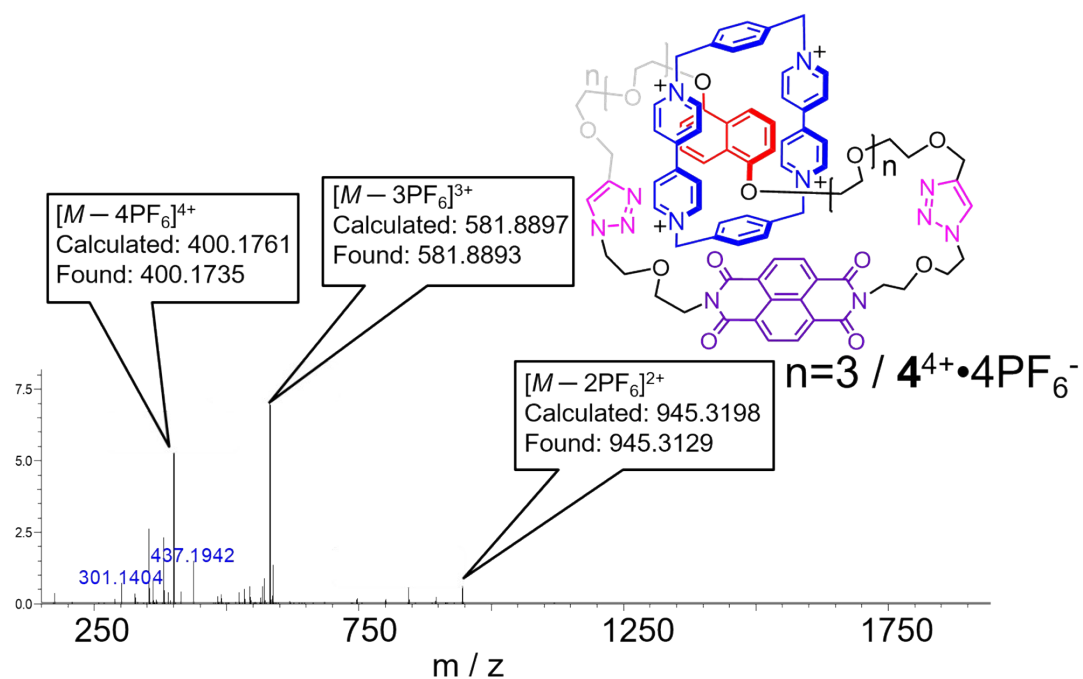

**Supplementary Figure 14.** ESI-MS of the [2]catenane  $4^{4+} \cdot 4PF_6^{-}$ . The signals labeled in the spectra correspond to molecular cations that contain four, three, and two positive charges, by losing corresponding amount of counteranions.

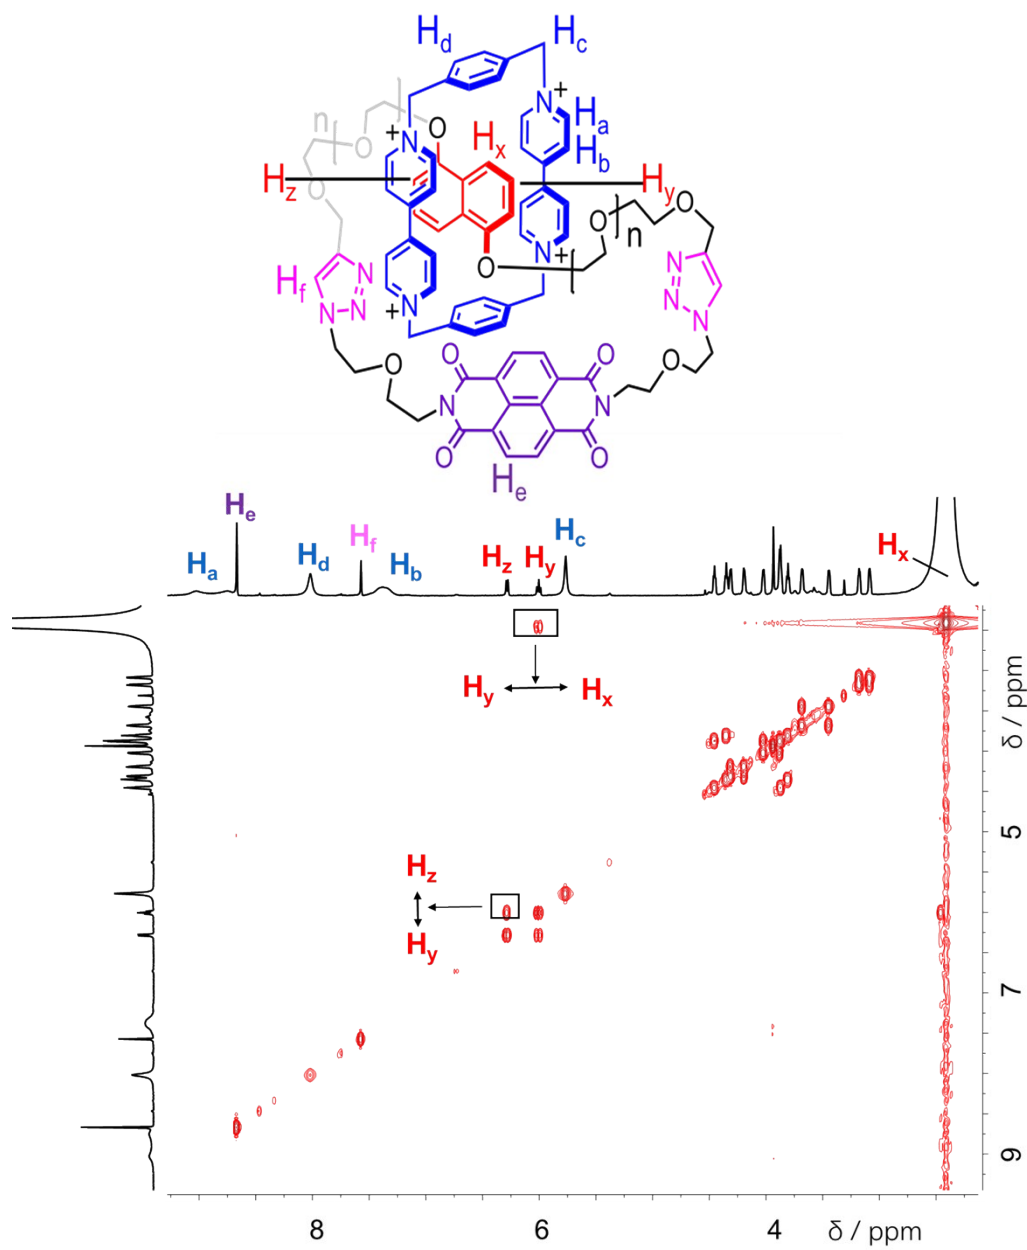

**Supplementary Figure 15.**  $^1H$ - $^1H$  COSY spectrum (500 MHz,  $CD_3CN$ , 298K) of the [2]catenane  $4^{4+} \cdot 4PF_6^{-}$ . Key correlation peaks are labeled in the spectrum.

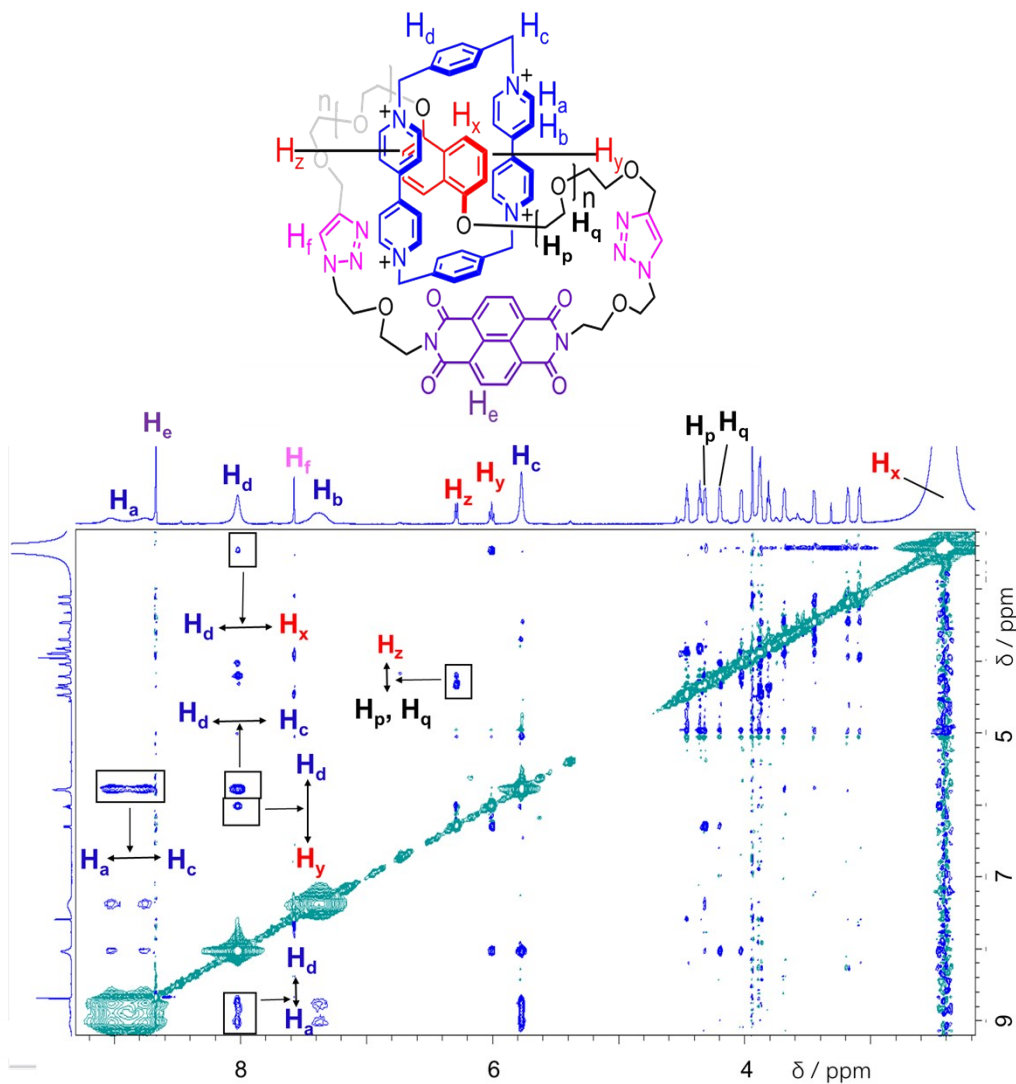

**Supplementary Figure 16.**  $^1H$ - $^1H$  NOESY spectrum (500 MHz,  $CD_3CN$ , 298K) of the [2]catenane  $4^{4+} \cdot 4PF_6^{-}$ . Key correlation peaks are labeled in the spectrum.



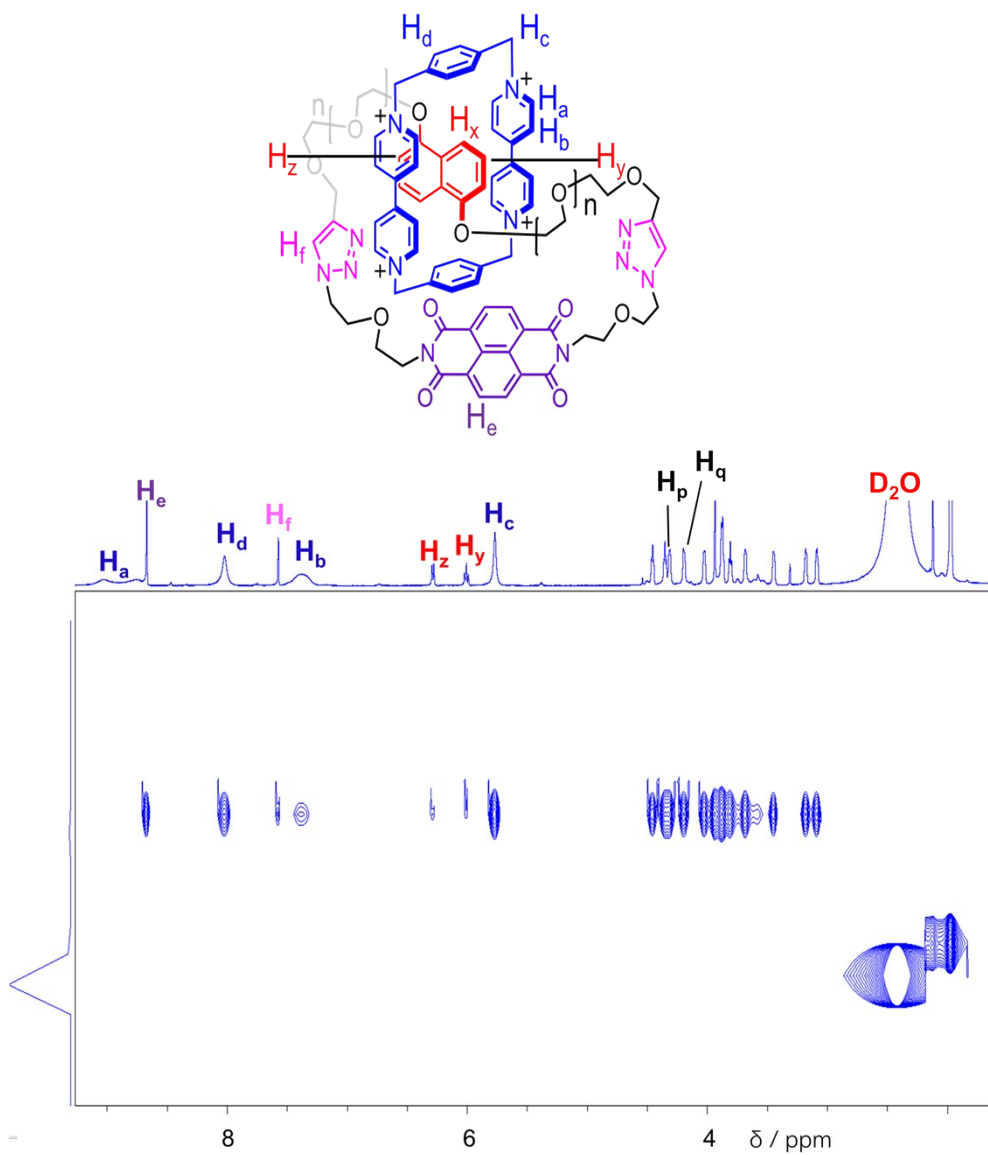

**Supplementary Figure 17.**  $^1\text{H}$ - $^1\text{H}$  DOSY spectrum (500 MHz,  $\text{CD}_3\text{CN}$ , 298K) of the [2]catenane  $4^{4+}\cdot 4\text{PF}_6^-$ .

**4. The Whole Reduction of Process of [2]Catenane  $4^{4+}\cdot 4\text{PF}_6^-$  and UV/ Vis/ NIR Spectroscopy.**

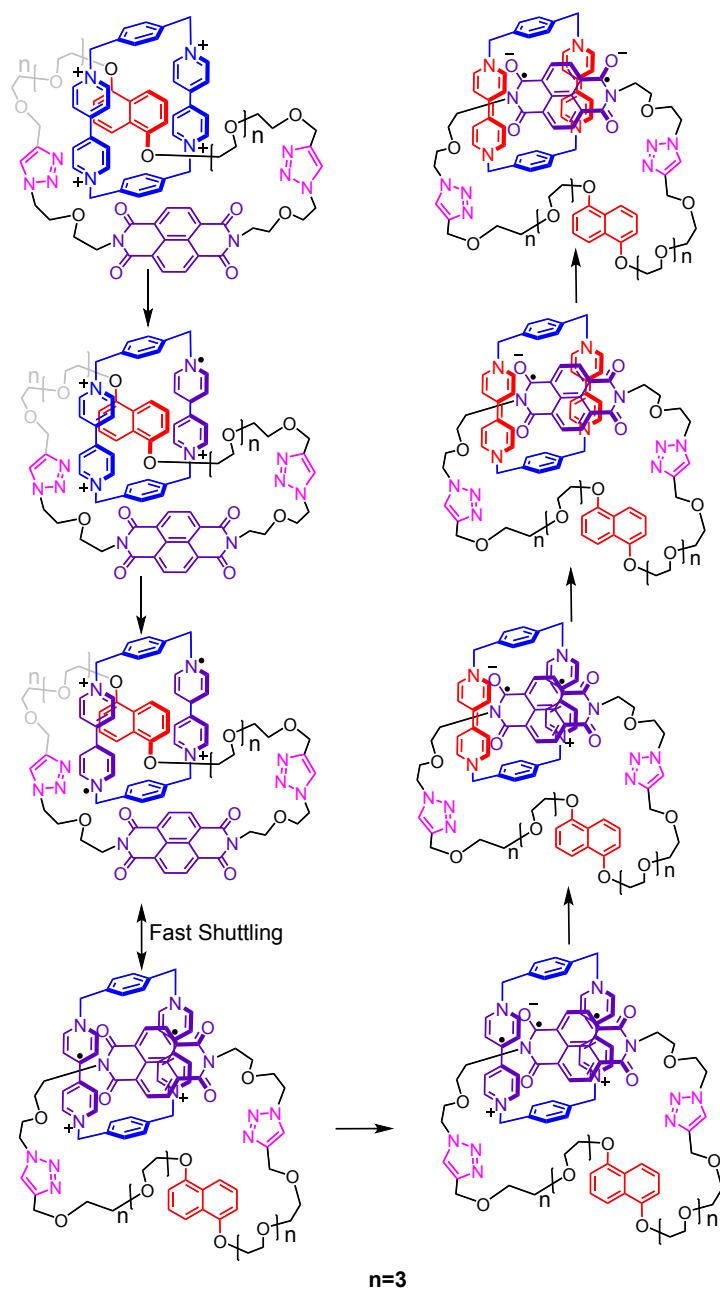

Supplementary Figure 18. Reduction of the [2]Catenane  $4^{4+} \cdot 4PF_6^-$

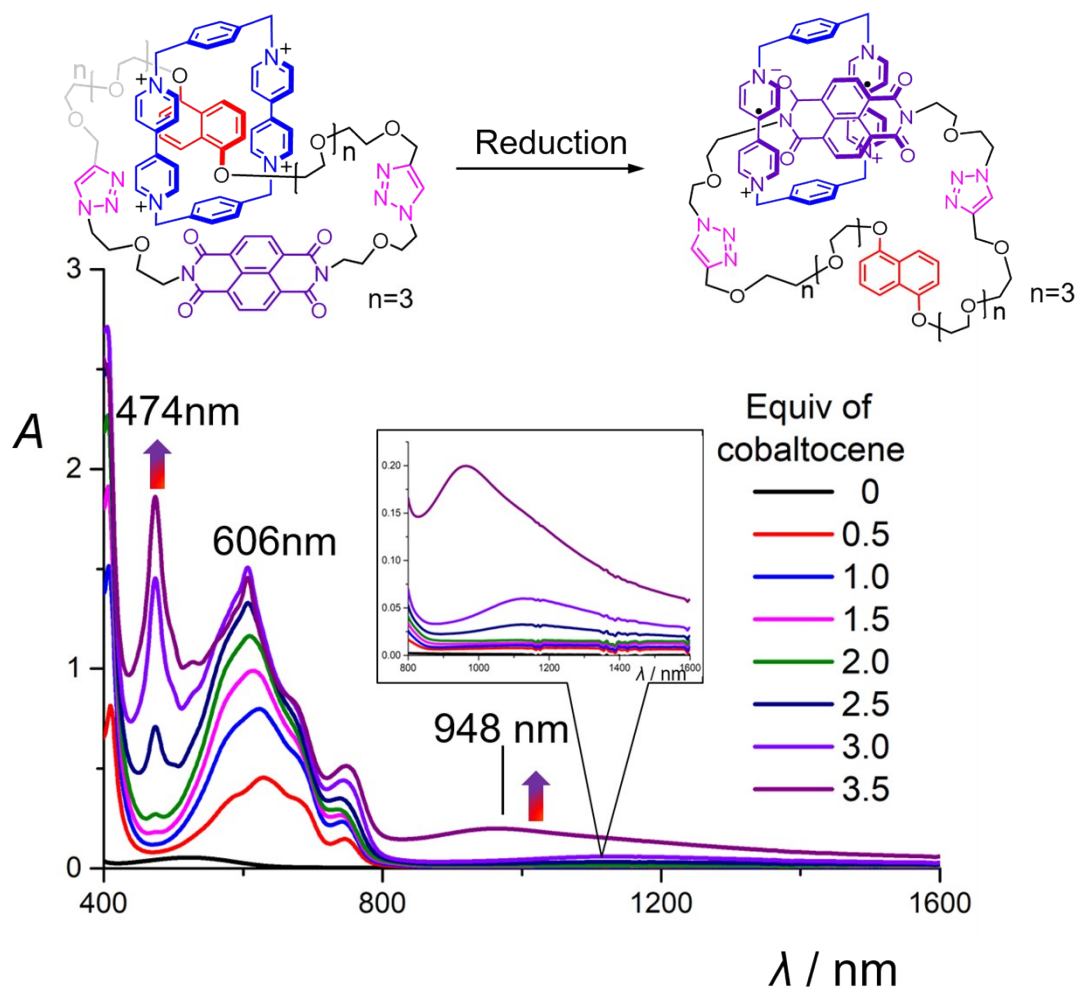

**Supplementary Figure 19.** The UV/Vis/NIR absorption spectra of the [2]Catenane  $4^{4+} \cdot 4PF_6^-$ , after adding different amount (from 0 to 3.5 equiv) of reductant, namely cobaltocene.

## 5. HPLC Analyses

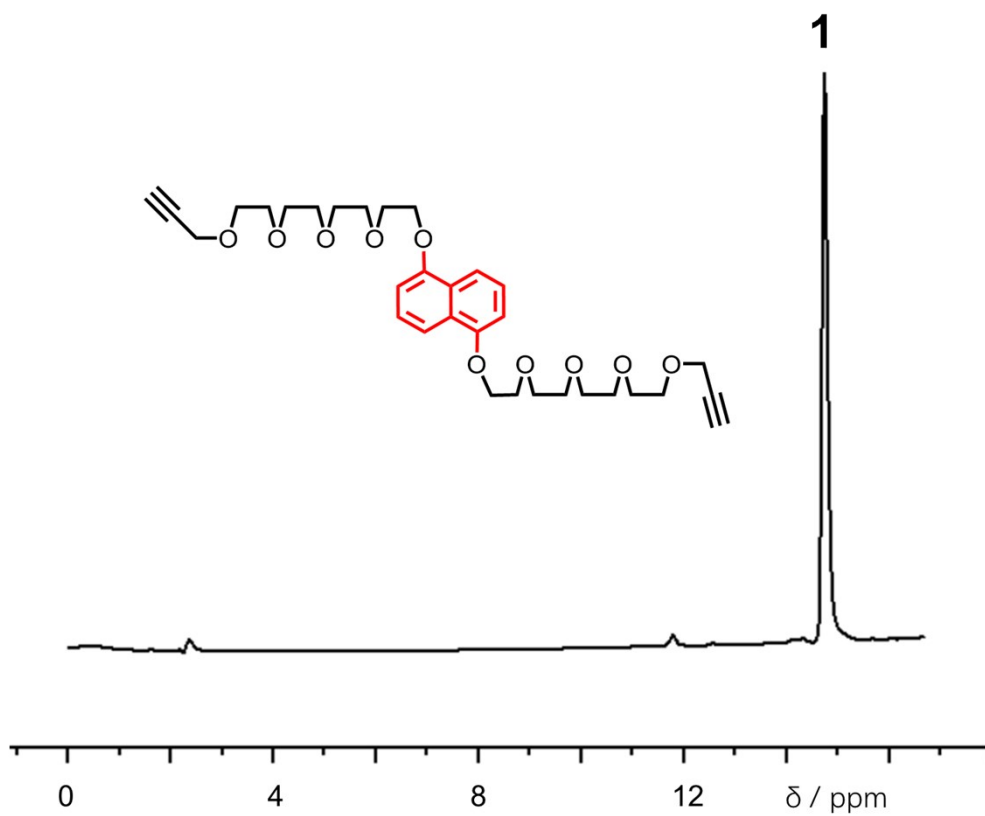

**Supplementary Figure 20.** Reversed-phase HPLC analysis of **1**.

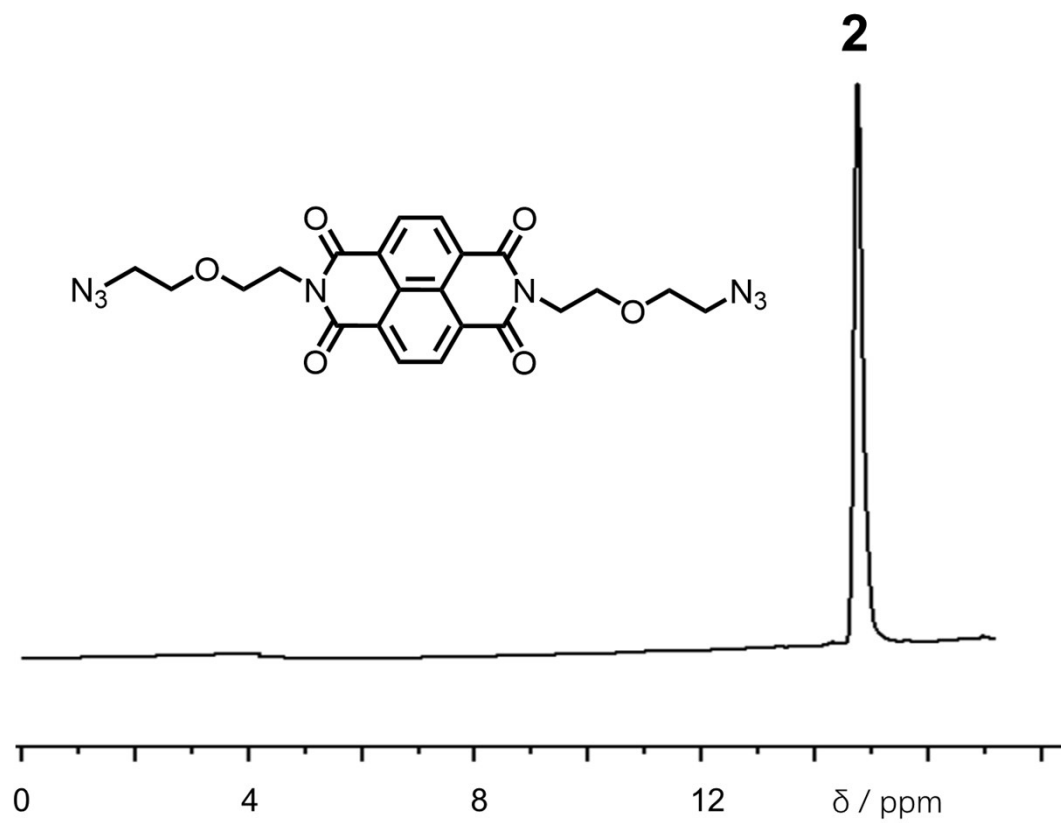

**Supplementary Figure 21.** Reversed-phase HPLC analysis of **2**.

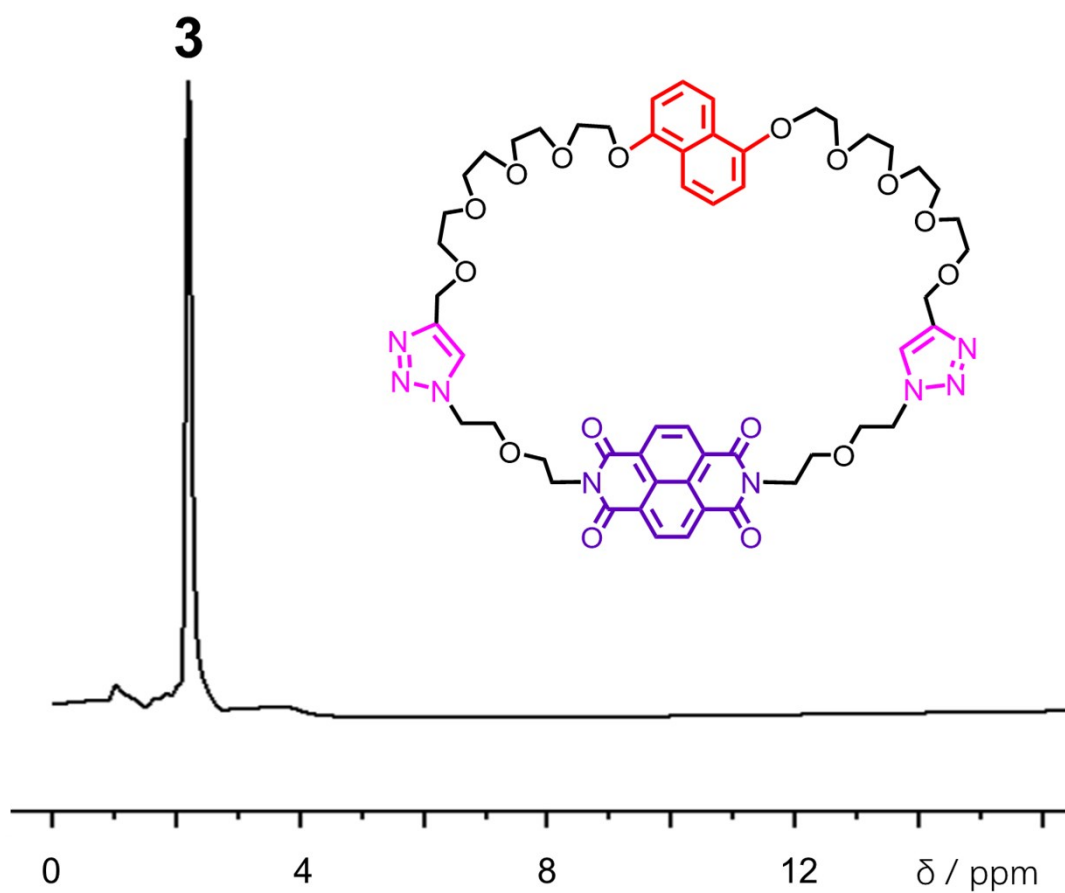

**Supplementary Figure 22.** Reversed-phase HPLC analysis of the macrocycle **3**.

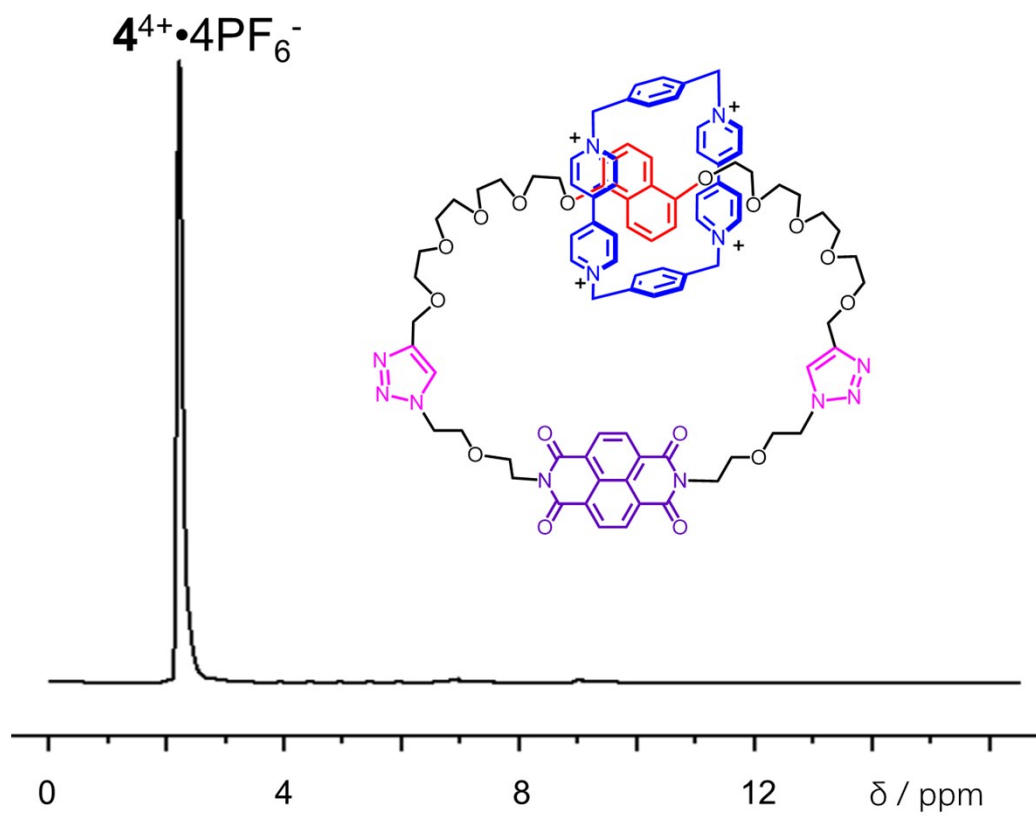

**Supplementary Figure 23.** Reversed-phase HPLC analysis of the [2]catenane.  $4^{4+} \cdot 4\text{PF}_6^-$ .

## 6. Reference

- 1 M. Asakawa, W. Dehaen, G. L'abbé, S. Menzer, J. Nouwen, F. M. Raymo, J. F. Stoddart, D. J. Williams, *J. Org. Chem.* 1996, **61**, 9591-9595.
- 2 O. Š. Miljanić, W. R. Dichtel, S. I. Khan, S. Mortezaei, J. R. Heath, J. F. Stoddart, *J. Am. Chem. Soc.* 2007, **129**, 26, 8236-8246.
